# Supplementary material
Source: PubMed Central journal article supplement (PMC7315030)

**Figure S3. Pearson's correlation coefficient matrix for discordant detection of a) *S. aureus* and b) *H. influenzae* by BFPP compared to SOC**

a.

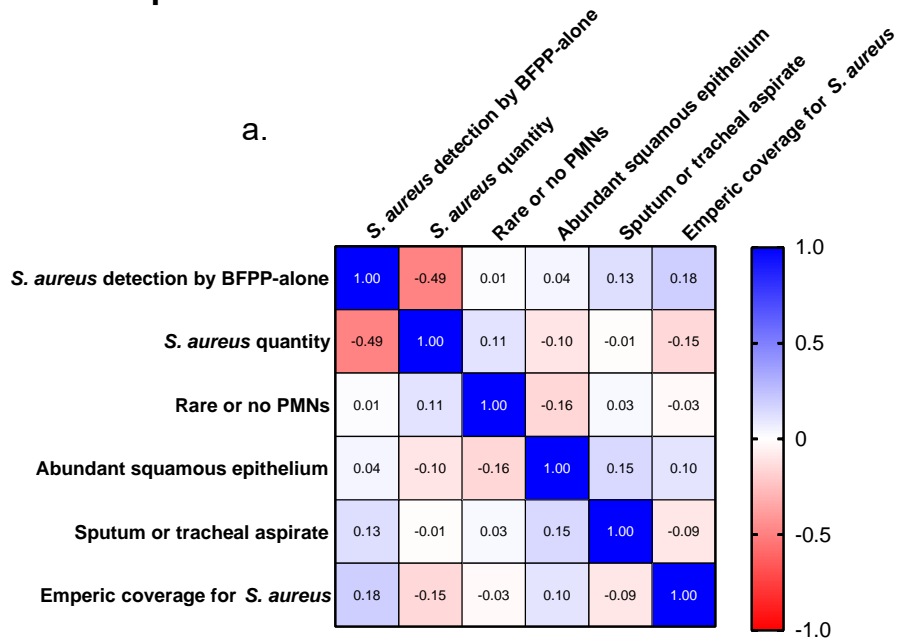

b.

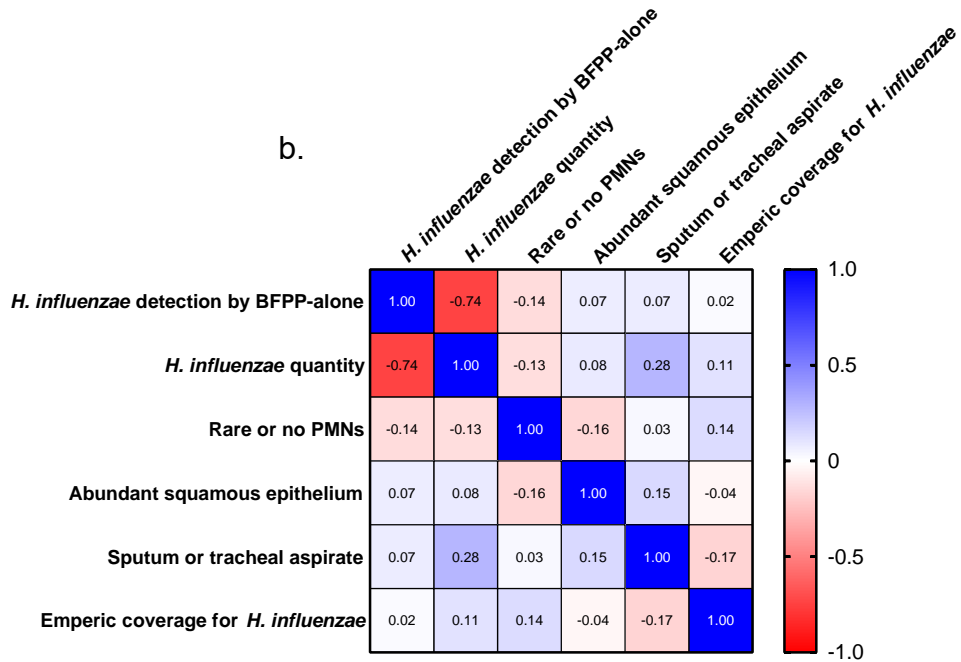

Supplement: JCM.00343-20-s0003.pdf [file JCM.00343-20-s0003.pdf]
